# Supplementary material for: Hypermethylation of miR-205-5p by IR Governs Aggressiveness and Metastasis via Regulating Bcl-w and Src
Source: PubMed Central journal article supplement (PMC6369268; doi:10.1016/j.omtn.2018.12.013), 2018-12-31
Supplement: mmc1.pdf [file mmc1.pdf]

**OMTN, Volume 14**

**Supplemental Information**

**Hypermethylation of miR-205-5p by IR  
Governs Aggressiveness and Metastasis  
via Regulating Bcl-w and Src**

**Eun Sook Kim, Jae Yeon Choi, Su Jin Hwang, and In Hwa Bae**

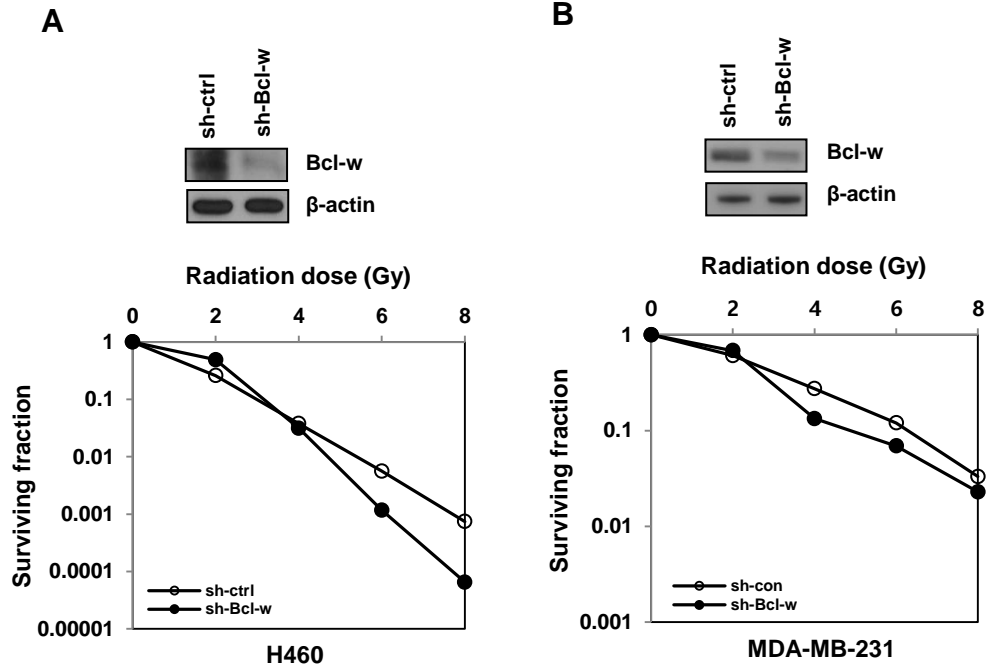

**Supplementary Figure S1. IR-induced Bcl-w is related to resistance of cancer cells.** After treatment of IR (2, 4, 6, and 8 Gy), clonogenic assay was conducted in sh-Bcl-w or sh-control-transfected cells, H460 (A) and MDA-MB-231 (B) for 14 days. Colonies of surviving cells were counted and expressed as a natural log was plotted.

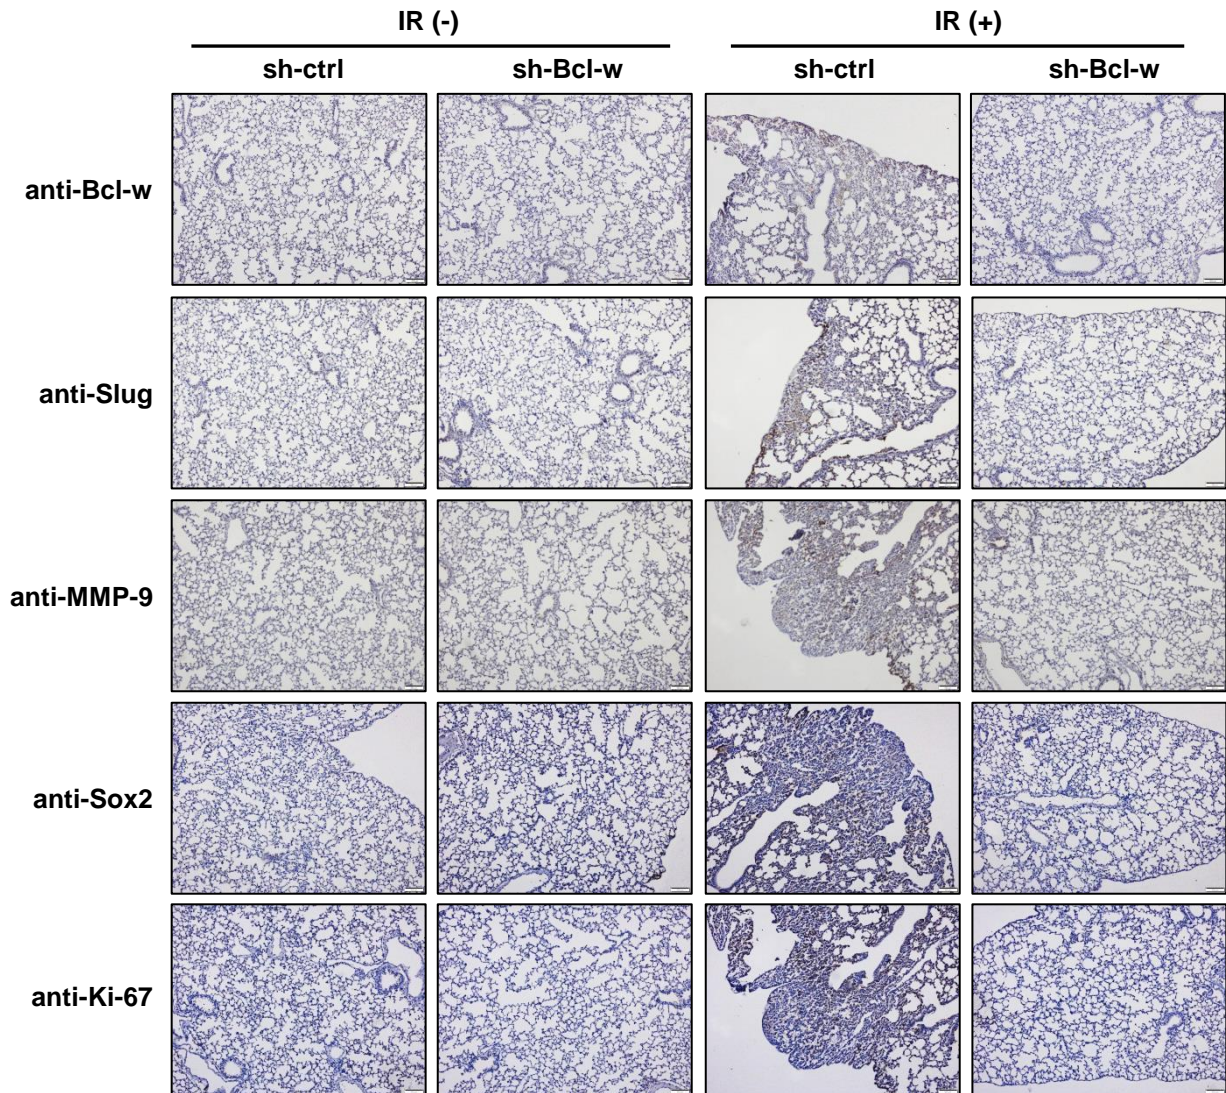

**Supplementary Figure S2. IR induces Bcl-w-related signaling components.** Expressions of Bcl-w, mesenchymal traits (Slug), invasiveness (MMP-9), stemness maintenance (Sox2), and proliferation marker (Ki-67) were shown in metastatic pulmonary tissues by immunohistochemistry staining (Scale bar, 100  $\mu\text{m}$ ).

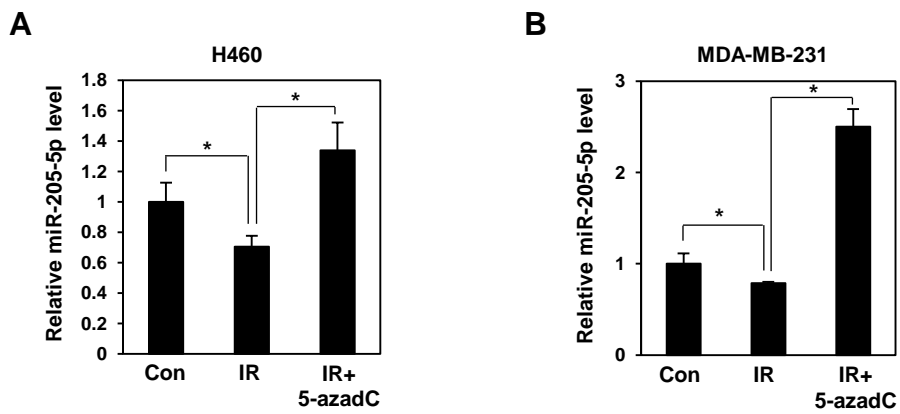

**Supplementary Figure S3. IR downregulates miR-205-5p expression via its methylation.** After IR exposed, H460 (A) and MDA-MB-231 (B) cells were treated with 5uM 5-Aza-2'-deoxycytidine (5-AzadC, DNMT1 inhibitor) for 48h. Expression of miR-205-5p was measured by qRT-PCR.

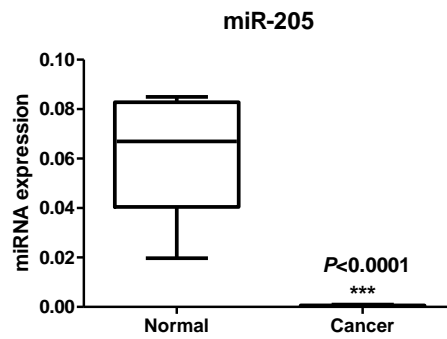

**Supplementary Figure S4. Expression of miR-205-5p is suppressed in lung cancer tissue of patients.** Analysis of miR-205-5p expression in lung cancer tissues compared to adjacent tissues by qRT-PCR.

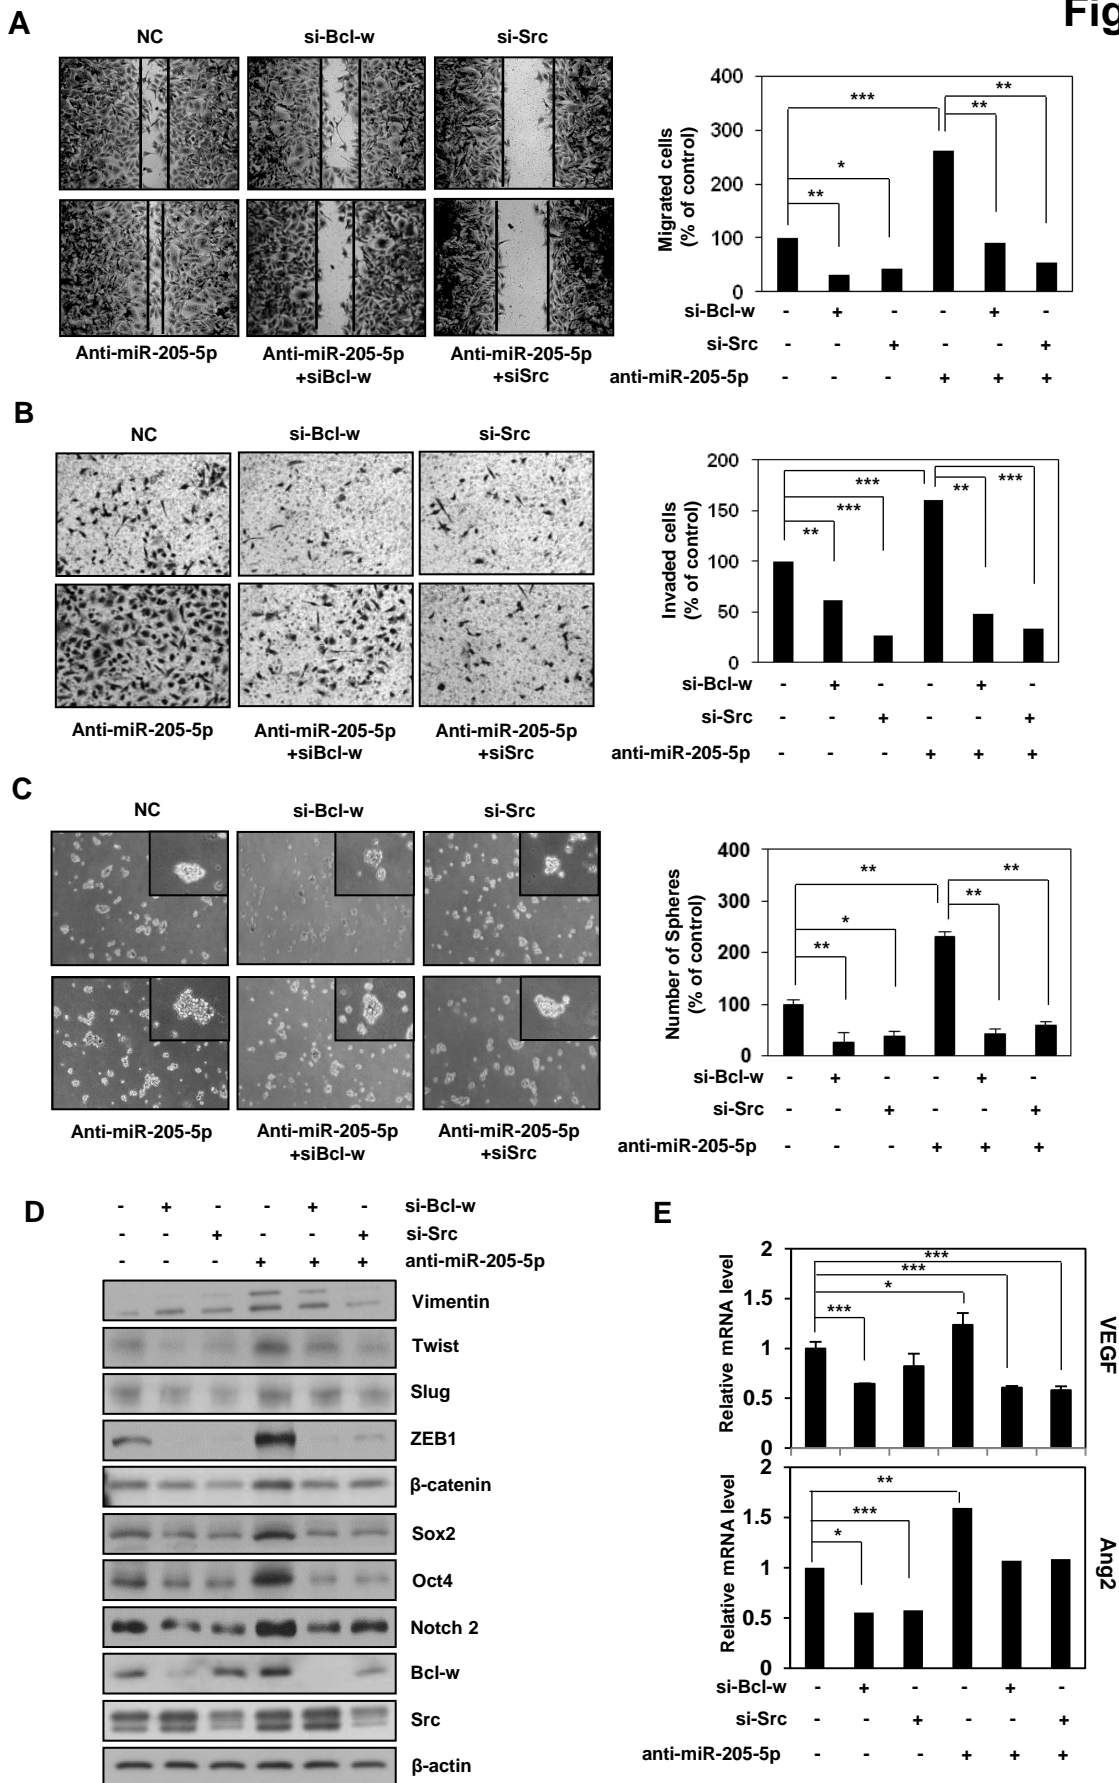

**Supplementary Figure S5. miR-205-5p mimic inhibits IR-induced Src-Bcl-w signaling axis which induced migration, invasion, and stemness.** Migration (A), invasion (B), sphere-formation assays (C), western blot analysis (D), and qRT-PCR (E) were performed using siRNA against Bcl-w and Src, and inhibitor of miR-205-5p in MDA-MB231 cells. All data are presented as the mean S.D. (\* P < 0.05, \*\* P < 0.005, \*\*\* P < 0.0005, Student's t-test).
